# Supplementary material for: Role of the conformational changes brought in the arms of the 1,3-di-capped conjugate of calix[4]arene (L) in turning on the fluorescence of L by Hg2+
Source: Royal Society of Chemistry journal article supplement (doi:10.1039/c1dt11208b), 2011-01-01
Supplement: c1dt11208b.pdf [file c1dt11208b.pdf]

# Role of the conformational twists brought in the arms of 1,3-Di-capped conjugate of calix[4]arene (**L**) in turning on the fluorescence of **L** by $\text{Hg}^{2+}$

Anilkumar Bandela, Jugun Prakash Chinta, and Chebrolu P. Rao \*

Department of Chemistry, Indian Institute of Technology Bombay, Powai, Mumbai - 400

076, India

email: [cprao@iitb.ac.in](mailto:cprao@iitb.ac.in)

## Electronic Supplementary Information

| Contents                                                                               | Page No. |
|----------------------------------------------------------------------------------------|----------|
| S01: Synthesis and Characterization of <b>L</b> and <b>4</b>                           | 2        |
| S02: Crystal data of <b>L</b>                                                          | 7        |
| S03: Fluorescence details                                                              | 15       |
| S04: Fluorescence spectral traces for the titration of <b>L</b> with $\text{M}^{n+}$   | 16       |
| S05: Fluorescence spectral data for minimum detection limit                            | 17       |
| S06: Absorption spectral traces for the titration of <b>L</b> with $\text{M}^{n+}$     | 18       |
| S07: $^1\text{H}$ NMR titration of <b>L</b> with mercuric perchlorate in DMSO          | 19       |
| S08: Synthesis and characterization of mercury complex of <b>L</b> ( <b>HgL</b> )      | 20       |
| S09: Mass and FTIR spectral data for isolated mercury complex                          | 21       |
| S10: Computational data                                                                | 23       |
| S11: TDDFT data                                                                        | 27       |
| S12: Gaussian 03 reference                                                             | 28       |
| S13: Absorption spectra and powder X-ray diffractograms of <b>L</b> and [ <b>HgL</b> ] | 29       |

### S01. Synthesis and Characterization of L and 4:

**(a). Synthesis and Characterization Data for the receptor molecule L:** To a mixture of **3** (0.5g, 1.02mmol) in dry methanol, 2,2'-(ethane-1,2-diylbis(oxy))dibenzaldehyde (0.5g, 2.55 mmol) was added with stirring and was heated at reflux for 2h. The product settled after cooling reaction mixture was filtered, separated and dried. Yield (0.635 g, 64 %). <sup>1</sup>H NMR (CDCl<sub>3</sub>, δ ppm): 1.11 (s, 18H, C(CH<sub>3</sub>)<sub>3</sub>), 1.24(s, 18H each, C(CH<sub>3</sub>)<sub>3</sub>), 3.33 (d, 4H, Ar-CH<sub>2</sub>-Ar, *J* = 13.33 Hz), 4.41 (t, 4H, CH<sub>2</sub>-CH<sub>3</sub>, *J* = 5.95 Hz), 4.32 (t, 4H, CH<sub>2</sub>-CH<sub>3</sub> *J* = 6.6 Hz), 4.39 (d, 4H, Ar-CH<sub>2</sub>-Ar *J* = 13.19 Hz), 4.45 (s, 4H, O-CH<sub>2</sub>-CH<sub>2</sub>-O), 6.97 (s, 4H, Ar-H), 7.01(s, 4H, Ar-H), 7.37 (t, 2H, Ar-H), 8.01(d, 2H, Ar-H)8.22 (s, 2H, Ar-OH), 8.95 (s, 2H, Ar-CH-N). <sup>13</sup>C NMR (CDCl<sub>3</sub>, 400 MHz δ ppm): 31.3, 31.8 (C(CH<sub>3</sub>)<sub>3</sub>), 32.3 (Ar-CH<sub>2</sub>-Ar), 34.2, 34.2 (C(CH<sub>3</sub>)<sub>3</sub>), 60.6 (OCH<sub>2</sub>CH<sub>2</sub>N), 68.2 (Ar-OCH<sub>2</sub>CH<sub>2</sub>), 75.6 (Ar-OCH<sub>2</sub>), 113.8, 122.2, 125.3, 125.9, 126.5, 128.1, 128.2, 131.9, 133.6, 141.5, 147.2, 150.2, 150.8, 157.9, 159.4 (Imine C, Ar-C). ESI-MS: *m/z* = 969, 100%. Anal. (% found) C 75.88, H 8.67, N 2.65, C<sub>64</sub>H<sub>76</sub>N<sub>2</sub>O<sub>6</sub>.2CH<sub>3</sub>OH.H<sub>2</sub>O (% Calculated) C 75.52, H 8.57, N 2.59.

(b)  $^1\text{H-NMR}$  spectrum of L in  $\text{CDCl}_3$

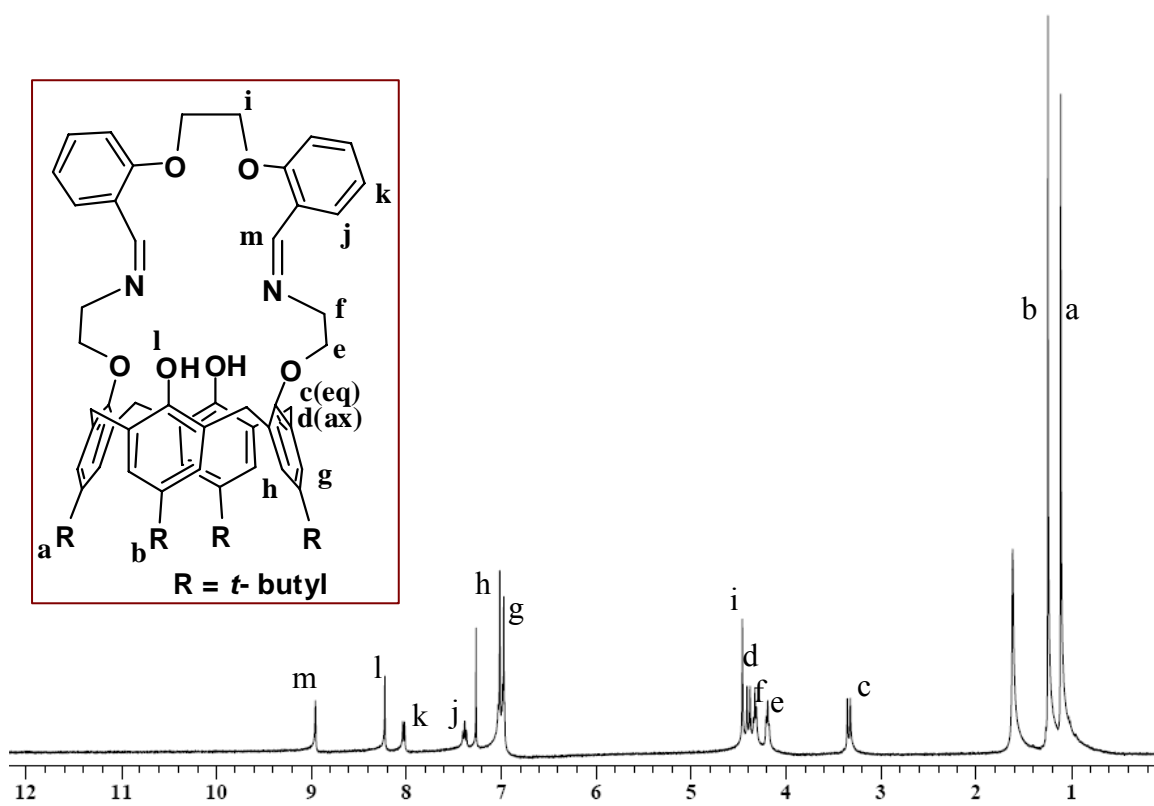

(c)  $^{13}\text{C-NMR}$  spectrum of L

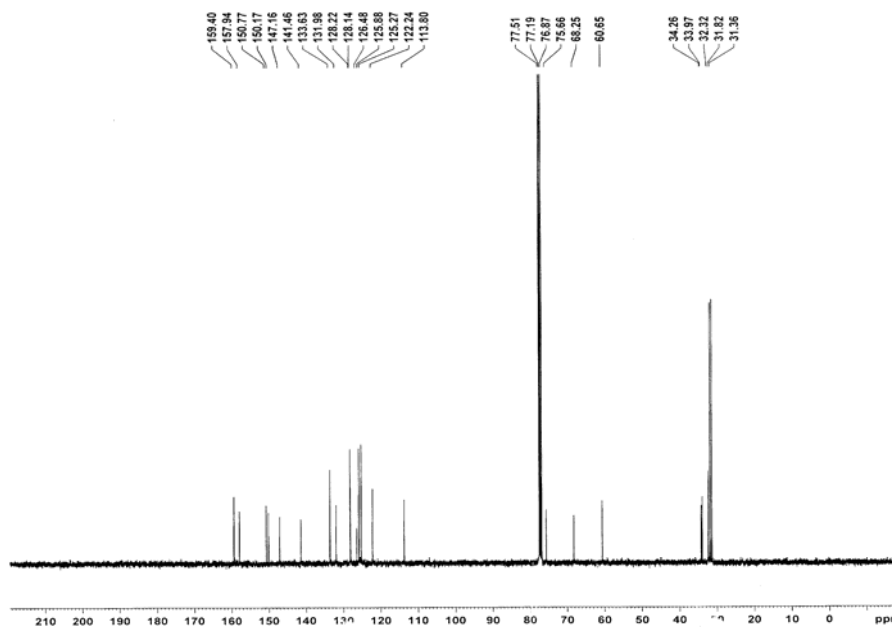

(d). ESI-MS spectrum of L (Positive ion mode)

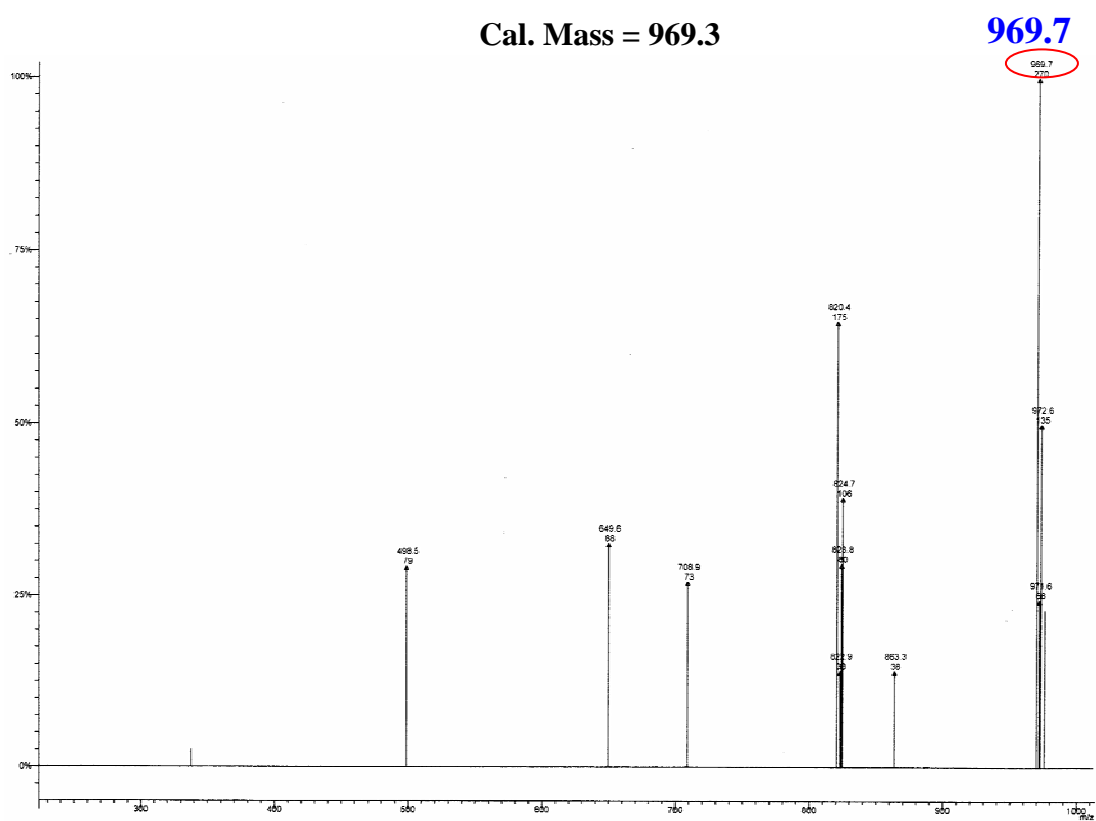

(e). FTIR spectrum of L:

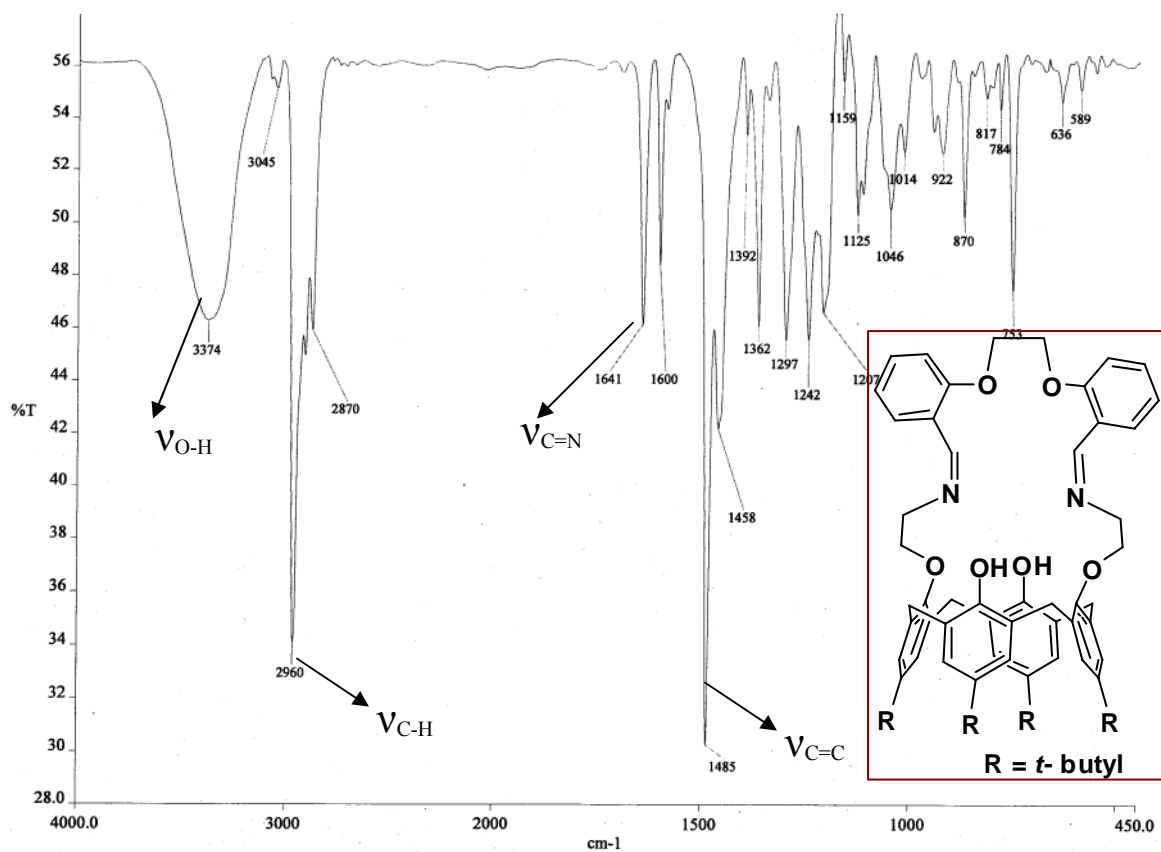

**(f). Synthesis and Characterization of 2,2'-(ethane-1,2-diylbis(oxy))dibenzaldehyde(4):**

To a mixture of salicylaldehyde (1.2 g, 9.82mmol) in ethanol-water mixture(3:30 v/v), NaOH (0.39g, 9.82mmol) followed by 1,2 dibromoethane (0.92g, 4.91mmol) was added followed by 60 mL ethanol and heated at reflux for 3 hrs. The product settled after cooling the reaction mixture, was filtered and dried. Yield (0.91 g, 33 %).  $^1\text{H}$  NMR ( $\text{CDCl}_3$ ,  $\delta$  ppm) 4.5 (s, 4H, Ar-OCH<sub>2</sub>), 7-7.2 (m, 4H, Ar-H), 7.6 (t, 2H each, Ar-H), 7.8(d, 2H, Ar-H), 10.4(s, 2H, Ar-CHO).

**(g)  $^1\text{H}$ -NMR spectrum of 4 in  $\text{CDCl}_3$**

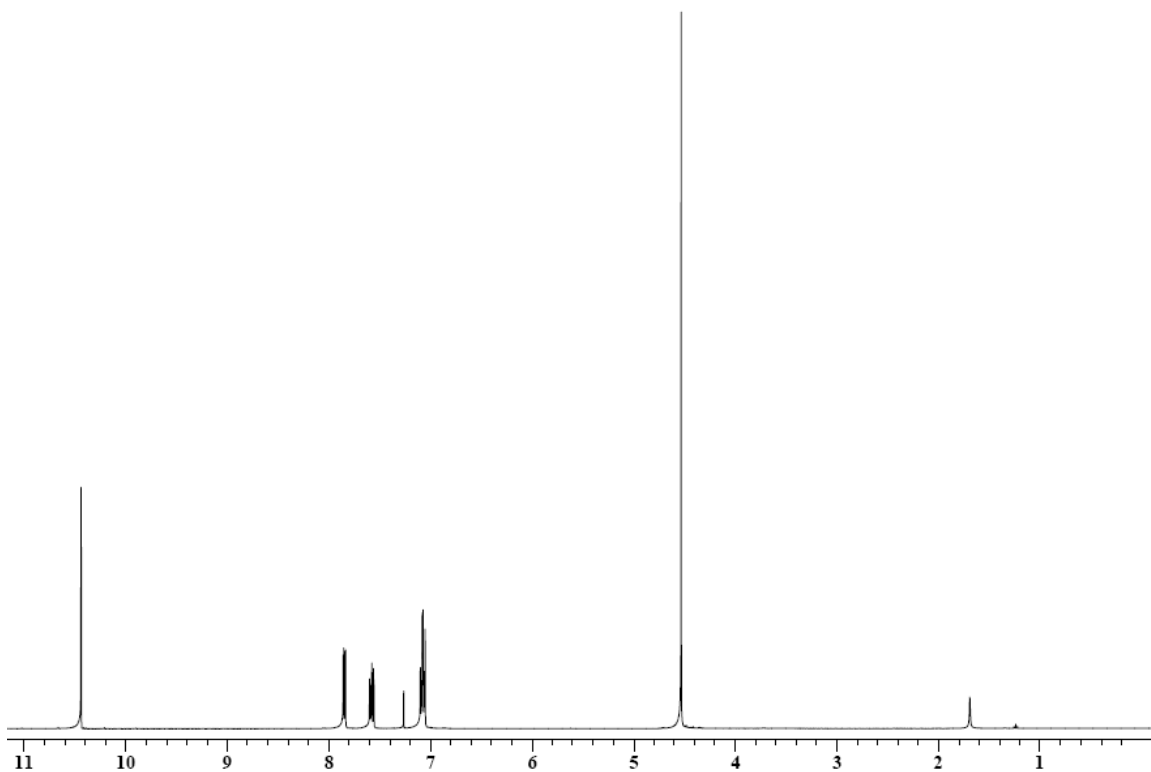

## S02: Crystal data of L

(a) ORTEP diagram of single crystal XRD structure of L at 50% ellipsoid probability (hydrogen atoms and solvent molecules are removed for clarity)

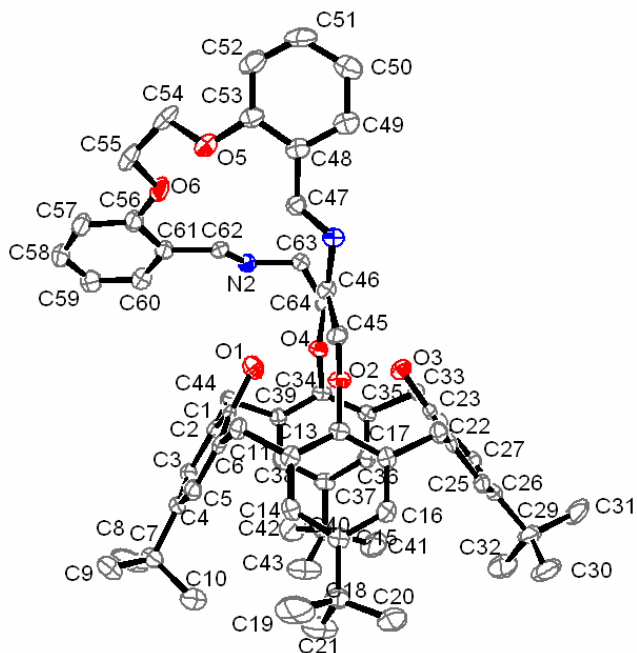

**(b). Crystallographic parameters for the structure determination and refinement:**

|                                            | <b>L</b>                                                                       |
|--------------------------------------------|--------------------------------------------------------------------------------|
| Empirical formula                          | C <sub>70</sub> H <sub>85</sub> Cl <sub>15</sub> N <sub>2</sub> O <sub>7</sub> |
| Formula weight                             | 1598.15                                                                        |
| Temperature (K)                            | 150(2)                                                                         |
| Crystal System                             | Monoclinic                                                                     |
| Space group                                | P 21/n                                                                         |
| a/Å                                        | 16.8707(5)                                                                     |
| b/Å                                        | 27.9775(7)                                                                     |
| c/Å                                        | 17.3438(4)                                                                     |
| α/°                                        | 90                                                                             |
| β/°                                        | 104.859(3)                                                                     |
| γ/°                                        | 90                                                                             |
| Volume/Å <sup>3</sup>                      | 7912.5(4)                                                                      |
| Z                                          | 4                                                                              |
| Absorption Coefficient (mm <sup>-1</sup> ) | 0.571 mm <sup>-1</sup>                                                         |
| Density                                    | 1.342 Mg/m <sup>3</sup>                                                        |
| Reflections collected                      | 57605                                                                          |
| Independent reflections                    | 13903                                                                          |
| R <sub>int</sub>                           | 0.0567                                                                         |
| Final R (I>2σ(I))                          | 0.0776                                                                         |
| wR <sub>2obs</sub>                         | 0.200                                                                          |
| Parameters                                 | 905                                                                            |



**(c) Bond distances (Å)**

|              |          |              |          |
|--------------|----------|--------------|----------|
| O(1)-C(1)    | 1.372(5) | C(14)-C(15)  | 1.387(6) |
| O(1)-H(101)  | 0.8400   | C(14)-H(14)  | 0.9500   |
| O(2)-C(12)   | 1.392(5) | C(16)-C(17)  | 1.392(6) |
| O(2)-C(45)   | 1.444(5) | C(16)-C(15)  | 1.397(6) |
| O(3)-C(23)   | 1.369(5) | C(16)-H(16)  | 0.9500   |
| O(3)-H(103)  | 0.8400   | C(15)-C(18)  | 1.526(6) |
| O(4)-C(34)   | 1.399(5) | C(17)-C(22)  | 1.520(6) |
| O(4)-C(64)   | 1.433(5) | C(18)-C(21)  | 1.524(7) |
| O(5)-C(53)   | 1.373(6) | C(18)-C(19)  | 1.524(7) |
| O(5)-C(54)   | 1.433(6) | C(18)-C(20)  | 1.528(7) |
| O(6)-C(56)   | 1.360(6) | C(19)-H(19A) | 0.9800   |
| O(6)-C(55)   | 1.439(5) | C(19)-H(19B) | 0.9800   |
| N(1)-C(47)   | 1.268(5) | C(19)-H(19C) | 0.9800   |
| N(1)-C(46)   | 1.457(6) | C(20)-H(20A) | 0.9800   |
| N(2)-C(62)   | 1.257(5) | C(20)-H(20B) | 0.9800   |
| N(2)-C(63)   | 1.464(5) | C(20)-H(20C) | 0.9800   |
| C(1)-C(2)    | 1.387(6) | C(21)-H(21A) | 0.9800   |
| C(1)-C(6)    | 1.403(6) | C(21)-H(21B) | 0.9800   |
| C(2)-C(3)    | 1.393(6) | C(21)-H(21C) | 0.9800   |
| C(2)-C(44)   | 1.519(6) | C(22)-C(24)  | 1.524(6) |
| C(3)-C(4)    | 1.396(6) | C(22)-H(22A) | 0.9900   |
| C(3)-H(3)    | 0.9500   | C(22)-H(22B) | 0.9900   |
| C(4)-C(5)    | 1.399(7) | C(23)-C(28)  | 1.385(6) |
| C(4)-C(7)    | 1.535(6) | C(23)-C(24)  | 1.406(6) |
| C(5)-C(6)    | 1.386(6) | C(24)-C(25)  | 1.390(6) |
| C(5)-H(5)    | 0.9500   | C(25)-C(26)  | 1.386(6) |
| C(6)-C(11)   | 1.516(6) | C(25)-H(25)  | 0.9500   |
| C(7)-C(9)    | 1.532(7) | C(26)-C(27)  | 1.393(6) |
| C(7)-C(8)    | 1.534(8) | C(26)-C(29)  | 1.537(6) |
| C(7)-C(10)   | 1.535(7) | C(27)-C(28)  | 1.394(6) |
| C(8)-H(8A)   | 0.9800   | C(27)-H(27)  | 0.9500   |
| C(8)-H(8B)   | 0.9800   | C(28)-C(33)  | 1.513(6) |
| C(8)-H(8C)   | 0.9800   | C(29)-C(30)  | 1.534(8) |
| C(9)-H(9A)   | 0.9800   | C(29)-C(31)  | 1.535(7) |
| C(9)-H(9B)   | 0.9800   | C(29)-C(32)  | 1.537(8) |
| C(9)-H(9C)   | 0.9800   | C(30)-H(30A) | 0.9800   |
| C(10)-H(10A) | 0.9800   | C(30)-H(30B) | 0.9800   |
| C(10)-H(10B) | 0.9800   | C(30)-H(30C) | 0.9800   |
| C(10)-H(10C) | 0.9800   | C(31)-H(31A) | 0.9800   |
| C(11)-C(13)  | 1.529(6) | C(31)-H(31B) | 0.9800   |
| C(11)-H(11A) | 0.9900   | C(31)-H(31C) | 0.9800   |
| C(11)-H(11B) | 0.9900   | C(32)-H(32A) | 0.9800   |
| C(12)-C(17)  | 1.381(6) | C(32)-H(32B) | 0.9800   |

|              |          |              |          |
|--------------|----------|--------------|----------|
| C(12)-C(13)  | 1.399(6) | C(32)-H(32C) | 0.9800   |
| C(13)-C(14)  | 1.392(6) | C(33)-C(35)  | 1.527(5) |
| C(33)-H(33A) | 0.9900   | C(54)-H(54B) | 0.9900   |
| C(33)-H(33B) | 0.9900   | C(55)-H(55A) | 0.9900   |
| C(34)-C(39)  | 1.393(6) | C(55)-H(55B) | 0.9900   |
| C(34)-C(35)  | 1.397(6) | C(56)-C(57)  | 1.399(6) |
| C(35)-C(36)  | 1.396(6) | C(56)-C(61)  | 1.403(6) |
| C(36)-C(37)  | 1.387(6) | C(57)-C(58)  | 1.381(8) |
| C(36)-H(36)  | 0.9500   | C(57)-H(57)  | 0.9500   |
| C(37)-C(38)  | 1.391(6) | C(58)-C(59)  | 1.379(8) |
| C(37)-C(40)  | 1.534(6) | C(58)-H(58)  | 0.9500   |
| C(38)-C(39)  | 1.385(6) | C(59)-C(60)  | 1.375(7) |
| C(38)-H(38)  | 0.9500   | C(59)-H(59)  | 0.9500   |
| C(39)-C(44)  | 1.524(5) | C(60)-C(61)  | 1.381(7) |
| C(40)-C(41)  | 1.507(7) | C(60)-H(60)  | 0.9500   |
| C(40)-C(42)  | 1.516(7) | C(61)-C(62)  | 1.481(6) |
| C(40)-C(43)  | 1.555(7) | C(62)-H(62)  | 0.9500   |
| C(41)-H(41A) | 0.9800   | C(63)-C(64)  | 1.512(6) |
| C(41)-H(41B) | 0.9800   | C(63)-H(63A) | 0.9900   |
| C(41)-H(41C) | 0.9800   | C(63)-H(63B) | 0.9900   |
| C(42)-H(42A) | 0.9800   | C(64)-H(64A) | 0.9900   |
| C(42)-H(42B) | 0.9800   | C(64)-H(64B) | 0.9900   |
| C(42)-H(42C) | 0.9800   | C(54)-C(55)  | 1.490(7) |
| C(43)-H(43A) | 0.9800   | C(54)-H(54A) | 0.9900   |
| C(43)-H(43B) | 0.9800   |              |          |
| C(43)-H(43C) | 0.9800   |              |          |
| C(44)-H(44A) | 0.9900   |              |          |
| C(44)-H(44B) | 0.9900   |              |          |
| C(45)-C(46)  | 1.517(6) |              |          |
| C(45)-H(45A) | 0.9900   |              |          |
| C(45)-H(45B) | 0.9900   |              |          |
| C(47)-C(48)  | 1.465(6) |              |          |
| C(47)-H(47)  | 0.9500   |              |          |
| C(46)-H(46A) | 0.9900   |              |          |
| C(46)-H(46B) | 0.9900   |              |          |
| C(48)-C(49)  | 1.393(6) |              |          |
| C(48)-C(53)  | 1.402(6) |              |          |
| C(49)-C(50)  | 1.384(7) |              |          |
| C(49)-H(49)  | 0.9500   |              |          |
| C(50)-C(51)  | 1.378(7) |              |          |
| C(50)-H(50)  | 0.9500   |              |          |
| C(51)-C(52)  | 1.367(8) |              |          |
| C(51)-H(51)  | 0.9500   |              |          |
| C(52)-C(53)  | 1.380(7) |              |          |
| C(52)-H(52)  | 0.9500   |              |          |

**(d) Bond angles (°)**

|                   |          |                     |          |
|-------------------|----------|---------------------|----------|
| C(1)-O(1)-H(101)  | 109.5    | C(7)-C(10)-H(10B)   | 109.5    |
| C(12)-O(2)-C(45)  | 118.0(3) | H(10A)-C(10)-H(10B) | 109.5    |
| C(23)-O(3)-H(103) | 109.5    | C(7)-C(10)-H(10C)   | 109.5    |
| C(34)-O(4)-C(64)  | 115.0(3) | H(10A)-C(10)-H(10C) | 109.5    |
| C(53)-O(5)-C(54)  | 117.4(4) | H(10B)-C(10)-H(10C) | 109.5    |
| C(56)-O(6)-C(55)  | 118.1(3) | C(6)-C(11)-C(13)    | 111.6(3) |
| C(47)-N(1)-C(46)  | 115.4(4) | C(6)-C(11)-H(11A)   | 109.3    |
| C(62)-N(2)-C(63)  | 118.3(4) | C(13)-C(11)-H(11A)  | 109.3    |
| O(1)-C(1)-C(2)    | 122.2(4) | C(6)-C(11)-H(11B)   | 109.3    |
| O(1)-C(1)-C(6)    | 117.1(4) | C(13)-C(11)-H(11B)  | 109.3    |
| C(2)-C(1)-C(6)    | 120.7(4) | H(11A)-C(11)-H(11B) | 108.0    |
| C(1)-C(2)-C(3)    | 119.0(4) | C(17)-C(12)-O(2)    | 118.5(4) |
| C(1)-C(2)-C(44)   | 121.5(4) | C(17)-C(12)-C(13)   | 122.1(4) |
| C(3)-C(2)-C(44)   | 119.3(4) | O(2)-C(12)-C(13)    | 119.0(4) |
| C(2)-C(3)-C(4)    | 122.5(4) | C(14)-C(13)-C(12)   | 117.2(4) |
| C(2)-C(3)-H(3)    | 118.7    | C(14)-C(13)-C(11)   | 120.9(4) |
| C(4)-C(3)-H(3)    | 118.7    | C(12)-C(13)-C(11)   | 121.8(4) |
| C(3)-C(4)-C(5)    | 116.4(4) | C(15)-C(14)-C(13)   | 123.0(4) |
| C(3)-C(4)-C(7)    | 122.3(4) | C(15)-C(14)-H(14)   | 118.5    |
| C(5)-C(4)-C(7)    | 121.2(4) | C(13)-C(14)-H(14)   | 118.5    |
| C(6)-C(5)-C(4)    | 123.2(4) | C(17)-C(16)-C(15)   | 122.3(4) |
| C(6)-C(5)-H(5)    | 118.4    | C(17)-C(16)-H(16)   | 118.9    |
| C(4)-C(5)-H(5)    | 118.4    | C(15)-C(16)-H(16)   | 118.9    |
| C(5)-C(6)-C(1)    | 118.2(4) | C(14)-C(15)-C(16)   | 117.1(4) |
| C(5)-C(6)-C(11)   | 120.3(4) | C(14)-C(15)-C(18)   | 120.4(4) |
| C(1)-C(6)-C(11)   | 121.5(4) | C(16)-C(15)-C(18)   | 122.4(4) |
| C(9)-C(7)-C(8)    | 108.5(5) | C(12)-C(17)-C(16)   | 118.1(4) |
| C(9)-C(7)-C(4)    | 110.1(4) | C(12)-C(17)-C(22)   | 121.8(4) |
| C(8)-C(7)-C(4)    | 111.8(4) | C(16)-C(17)-C(22)   | 120.0(4) |
| C(9)-C(7)-C(10)   | 109.7(4) | C(21)-C(18)-C(19)   | 108.9(5) |
| C(8)-C(7)-C(10)   | 108.7(5) | C(21)-C(18)-C(15)   | 108.0(4) |
| C(4)-C(7)-C(10)   | 108.1(4) | C(19)-C(18)-C(15)   | 110.1(4) |
| C(7)-C(8)-H(8A)   | 109.5    | C(21)-C(18)-C(20)   | 110.0(5) |
| C(7)-C(8)-H(8B)   | 109.5    | C(19)-C(18)-C(20)   | 107.9(5) |
| H(8A)-C(8)-H(8B)  | 109.5    | C(15)-C(18)-C(20)   | 112.0(4) |
| C(7)-C(8)-H(8C)   | 109.5    | C(18)-C(19)-H(19A)  | 109.5    |
| H(8A)-C(8)-H(8C)  | 109.5    | C(18)-C(19)-H(19B)  | 109.5    |
| H(8B)-C(8)-H(8C)  | 109.5    | H(19A)-C(19)-H(19B) | 109.5    |
| C(7)-C(9)-H(9A)   | 109.5    | C(18)-C(19)-H(19C)  | 109.5    |
| C(7)-C(9)-H(9B)   | 109.5    | H(19A)-C(19)-H(19C) | 109.5    |
| H(9A)-C(9)-H(9B)  | 109.5    | H(19B)-C(19)-H(19C) | 109.5    |
| C(7)-C(9)-H(9C)   | 109.5    | C(18)-C(20)-H(20A)  | 109.5    |

|                     |          |                     |          |
|---------------------|----------|---------------------|----------|
| H(9A)-C(9)-H(9C)    | 109.5    | C(18)-C(20)-H(20B)  | 109.5    |
| H(9B)-C(9)-H(9C)    | 109.5    | H(20A)-C(20)-H(20B) | 109.5    |
| C(7)-C(10)-H(10A)   | 109.5    | C(18)-C(20)-H(20C)  | 109.5    |
| H(20A)-C(20)-H(20C) | 109.5    | C(29)-C(31)-H(31B)  | 109.5    |
| H(20B)-C(20)-H(20C) | 109.5    | H(31A)-C(31)-H(31B) | 109.5    |
| C(18)-C(21)-H(21A)  | 109.5    | C(29)-C(31)-H(31C)  | 109.5    |
| C(18)-C(21)-H(21B)  | 109.5    | H(31A)-C(31)-H(31C) | 109.5    |
| H(21A)-C(21)-H(21B) | 109.5    | H(31B)-C(31)-H(31C) | 109.5    |
| C(18)-C(21)-H(21C)  | 109.5    | C(29)-C(32)-H(32A)  | 109.5    |
| H(21A)-C(21)-H(21C) | 109.5    | C(29)-C(32)-H(32B)  | 109.5    |
| H(21B)-C(21)-H(21C) | 109.5    | H(32A)-C(32)-H(32B) | 109.5    |
| C(17)-C(22)-C(24)   | 112.9(3) | C(29)-C(32)-H(32C)  | 109.5    |
| C(17)-C(22)-H(22A)  | 109.0    | H(32A)-C(32)-H(32C) | 109.5    |
| C(24)-C(22)-H(22A)  | 109.0    | H(32B)-C(32)-H(32C) | 109.5    |
| C(17)-C(22)-H(22B)  | 109.0    | C(28)-C(33)-C(35)   | 110.4(3) |
| C(24)-C(22)-H(22B)  | 109.0    | C(28)-C(33)-H(33A)  | 109.6    |
| H(22A)-C(22)-H(22B) | 107.8    | C(35)-C(33)-H(33A)  | 109.6    |
| O(3)-C(23)-C(28)    | 116.9(4) | C(28)-C(33)-H(33B)  | 109.6    |
| O(3)-C(23)-C(24)    | 122.4(4) | C(35)-C(33)-H(33B)  | 109.6    |
| C(28)-C(23)-C(24)   | 120.7(4) | H(33A)-C(33)-H(33B) | 108.1    |
| C(25)-C(24)-C(23)   | 118.2(4) | C(39)-C(34)-C(35)   | 120.9(4) |
| C(25)-C(24)-C(22)   | 119.9(4) | C(39)-C(34)-O(4)    | 117.5(3) |
| C(23)-C(24)-C(22)   | 121.8(4) | C(35)-C(34)-O(4)    | 121.5(3) |
| C(26)-C(25)-C(24)   | 122.5(4) | C(36)-C(35)-C(34)   | 117.8(4) |
| C(26)-C(25)-H(25)   | 118.7    | C(36)-C(35)-C(33)   | 118.0(4) |
| C(24)-C(25)-H(25)   | 118.7    | C(34)-C(35)-C(33)   | 124.1(4) |
| C(25)-C(26)-C(27)   | 117.6(4) | C(37)-C(36)-C(35)   | 123.1(4) |
| C(25)-C(26)-C(29)   | 122.7(4) | C(37)-C(36)-H(36)   | 118.5    |
| C(27)-C(26)-C(29)   | 119.7(4) | C(35)-C(36)-H(36)   | 118.5    |
| C(26)-C(27)-C(28)   | 121.8(4) | C(36)-C(37)-C(38)   | 116.9(4) |
| C(26)-C(27)-H(27)   | 119.1    | C(36)-C(37)-C(40)   | 123.0(4) |
| C(28)-C(27)-H(27)   | 119.1    | C(38)-C(37)-C(40)   | 120.1(4) |
| C(23)-C(28)-C(27)   | 119.1(4) | C(39)-C(38)-C(37)   | 122.5(4) |
| C(23)-C(28)-C(33)   | 119.2(4) | C(39)-C(38)-H(38)   | 118.7    |
| C(27)-C(28)-C(33)   | 121.6(4) | C(37)-C(38)-H(38)   | 118.7    |
| C(30)-C(29)-C(31)   | 108.1(4) | C(38)-C(39)-C(34)   | 118.8(4) |
| C(30)-C(29)-C(26)   | 111.8(4) | C(38)-C(39)-C(44)   | 119.2(4) |
| C(31)-C(29)-C(26)   | 109.1(4) | C(34)-C(39)-C(44)   | 121.6(4) |
| C(30)-C(29)-C(32)   | 109.1(5) | C(41)-C(40)-C(42)   | 109.9(4) |
| C(31)-C(29)-C(32)   | 109.9(5) | C(41)-C(40)-C(37)   | 112.4(4) |
| C(26)-C(29)-C(32)   | 108.9(4) | C(42)-C(40)-C(37)   | 110.4(4) |
| C(29)-C(30)-H(30A)  | 109.5    | C(41)-C(40)-C(43)   | 108.5(5) |
| C(29)-C(30)-H(30B)  | 109.5    | C(42)-C(40)-C(43)   | 107.0(4) |
| H(30A)-C(30)-H(30B) | 109.5    | C(37)-C(40)-C(43)   | 108.4(4) |
| C(29)-C(30)-H(30C)  | 109.5    | C(40)-C(41)-H(41A)  | 109.5    |

|                     |          |                     |          |
|---------------------|----------|---------------------|----------|
| H(30A)-C(30)-H(30C) | 109.5    | C(40)-C(41)-H(41B)  | 109.5    |
| H(30B)-C(30)-H(30C) | 109.5    | H(41A)-C(41)-H(41B) | 109.5    |
| C(29)-C(31)-H(31A)  | 109.5    |                     |          |
| C(40)-C(41)-H(41C)  | 109.5    | C(52)-C(51)-C(50)   | 121.1(5) |
| H(41A)-C(41)-H(41C) | 109.5    | C(52)-C(51)-H(51)   | 119.5    |
| H(41B)-C(41)-H(41C) | 109.5    | C(50)-C(51)-H(51)   | 119.5    |
| C(40)-C(42)-H(42A)  | 109.5    | C(51)-C(52)-C(53)   | 120.0(5) |
| C(40)-C(42)-H(42B)  | 109.5    | C(51)-C(52)-H(52)   | 120.0    |
| H(42A)-C(42)-H(42B) | 109.5    | C(53)-C(52)-H(52)   | 120.0    |
| C(40)-C(42)-H(42C)  | 109.5    | O(5)-C(53)-C(52)    | 124.5(4) |
| H(42A)-C(42)-H(42C) | 109.5    | O(5)-C(53)-C(48)    | 115.1(4) |
| H(42B)-C(42)-H(42C) | 109.5    | C(52)-C(53)-C(48)   | 120.4(5) |
| C(40)-C(43)-H(43A)  | 109.5    | O(5)-C(54)-C(55)    | 108.4(4) |
| C(40)-C(43)-H(43B)  | 109.5    | O(5)-C(54)-H(54A)   | 110.0    |
| H(43A)-C(43)-H(43B) | 109.5    | C(55)-C(54)-H(54A)  | 110.0    |
| C(40)-C(43)-H(43C)  | 109.5    | O(5)-C(54)-H(54B)   | 110.0    |
| H(43A)-C(43)-H(43C) | 109.5    | C(55)-C(54)-H(54B)  | 110.0    |
| H(43B)-C(43)-H(43C) | 109.5    | H(54A)-C(54)-H(54B) | 108.4    |
| C(2)-C(44)-C(39)    | 108.3(3) | O(6)-C(55)-C(54)    | 107.2(4) |
| C(2)-C(44)-H(44A)   | 110.0    | O(6)-C(55)-H(55A)   | 110.3    |
| C(39)-C(44)-H(44A)  | 110.0    | C(54)-C(55)-H(55A)  | 110.3    |
| C(2)-C(44)-H(44B)   | 110.0    | O(6)-C(55)-H(55B)   | 110.3    |
| C(39)-C(44)-H(44B)  | 110.0    | C(54)-C(55)-H(55B)  | 110.3    |
| H(44A)-C(44)-H(44B) | 108.4    | H(55A)-C(55)-H(55B) | 108.5    |
| O(2)-C(45)-C(46)    | 103.5(3) | O(6)-C(56)-C(57)    | 124.5(4) |
| O(2)-C(45)-H(45A)   | 111.1    | O(6)-C(56)-C(61)    | 115.9(4) |
| C(46)-C(45)-H(45A)  | 111.1    | C(57)-C(56)-C(61)   | 119.7(5) |
| O(2)-C(45)-H(45B)   | 111.1    | C(58)-C(57)-C(56)   | 119.0(5) |
| C(46)-C(45)-H(45B)  | 111.1    | C(58)-C(57)-H(57)   | 120.5    |
| H(45A)-C(45)-H(45B) | 109.0    | C(56)-C(57)-H(57)   | 120.5    |
| N(1)-C(47)-C(48)    | 123.5(4) | C(59)-C(58)-C(57)   | 121.7(5) |
| N(1)-C(47)-H(47)    | 118.2    | C(59)-C(58)-H(58)   | 119.2    |
| C(48)-C(47)-H(47)   | 118.2    | C(57)-C(58)-H(58)   | 119.2    |
| N(1)-C(46)-C(45)    | 112.2(4) | C(60)-C(59)-C(58)   | 118.8(5) |
| N(1)-C(46)-H(46A)   | 109.2    | C(60)-C(59)-H(59)   | 120.6    |
| C(45)-C(46)-H(46A)  | 109.2    | C(58)-C(59)-H(59)   | 120.6    |
| N(1)-C(46)-H(46B)   | 109.2    | C(59)-C(60)-C(61)   | 121.6(5) |
| C(45)-C(46)-H(46B)  | 109.2    | C(59)-C(60)-H(60)   | 119.2    |
| H(46A)-C(46)-H(46B) | 107.9    | C(61)-C(60)-H(60)   | 119.2    |
| C(49)-C(48)-C(53)   | 118.4(4) | C(60)-C(61)-C(56)   | 119.1(4) |
| C(49)-C(48)-C(47)   | 121.8(4) | C(60)-C(61)-C(62)   | 121.0(4) |
| C(53)-C(48)-C(47)   | 119.6(4) | C(56)-C(61)-C(62)   | 119.9(4) |
| C(50)-C(49)-C(48)   | 120.7(5) | N(2)-C(62)-C(61)    | 122.0(4) |
| C(50)-C(49)-H(49)   | 119.6    | N(2)-C(62)-H(62)    | 119.0    |
| C(48)-C(49)-H(49)   | 119.6    | C(61)-C(62)-H(62)   | 119.0    |

|                     |          |                    |          |
|---------------------|----------|--------------------|----------|
| C(51)-C(50)-C(49)   | 119.4(5) | N(2)-C(63)-C(64)   | 110.9(3) |
| C(51)-C(50)-H(50)   | 120.3    | N(2)-C(63)-H(63A)  | 109.5    |
| C(49)-C(50)-H(50)   | 120.3    | C(64)-C(63)-H(63A) | 109.5    |
| N(2)-C(63)-H(63B)   | 109.5    |                    |          |
| C(64)-C(63)-H(63B)  | 109.5    |                    |          |
| H(63A)-C(63)-H(63B) | 108.0    |                    |          |
| O(4)-C(64)-C(63)    | 108.6(3) |                    |          |
| O(4)-C(64)-H(64A)   | 110.0    |                    |          |
| C(63)-C(64)-H(64A)  | 110.0    |                    |          |
| O(4)-C(64)-H(64B)   | 110.0    |                    |          |
| C(63)-C(64)-H(64B)  | 110.0    |                    |          |
| H(64A)-C(64)-H(64B) | 108.3    |                    |          |

### **S03. Fluorescence details:**

Fluorescence emission spectra were measured on Perkin-Elmer LS55. The bulk solutions of **L** and metal ions were prepared in ethanol in which, 50  $\mu\text{L}$  of  $\text{CHCl}_3$  was used for dissolving **L**. Bulk solution concentration of **L** & metal ions were maintained at  $6 \times 10^{-4}$  M. All the measurements were made in 1 cm quartz cell and maintained the effective cuvette concentration of **L** as 10  $\mu\text{M}$  in all the titrations. During the titration, the concentration of the metal ions was varied accordingly in order to result in requisite mole ratios of these to **L** by taking a fixed volume of **L** and adding and varying volumes of the solution of the guest metal ions. The total volume of the solution used for the fluorescence measurements was maintained constant at 3 ml in all the cases by simply making up the solution using requisite volume of ethanol. Absorption studies were carried out similarly on JASCO V-570. The bulk solutions of **L** and metal ions were maintained at  $1 \times 10^{-3}$  M. All the measurements were made in 1 cm quartz cell and maintained the effective cuvette concentration of **L** as 33  $\mu\text{M}$  in all the titrations while increasing the concentration of metal ions to obtain requisite mole ratios with respect to **L**.

### S04. Fluorescence spectral traces for the titration of L with $M^{n+}$

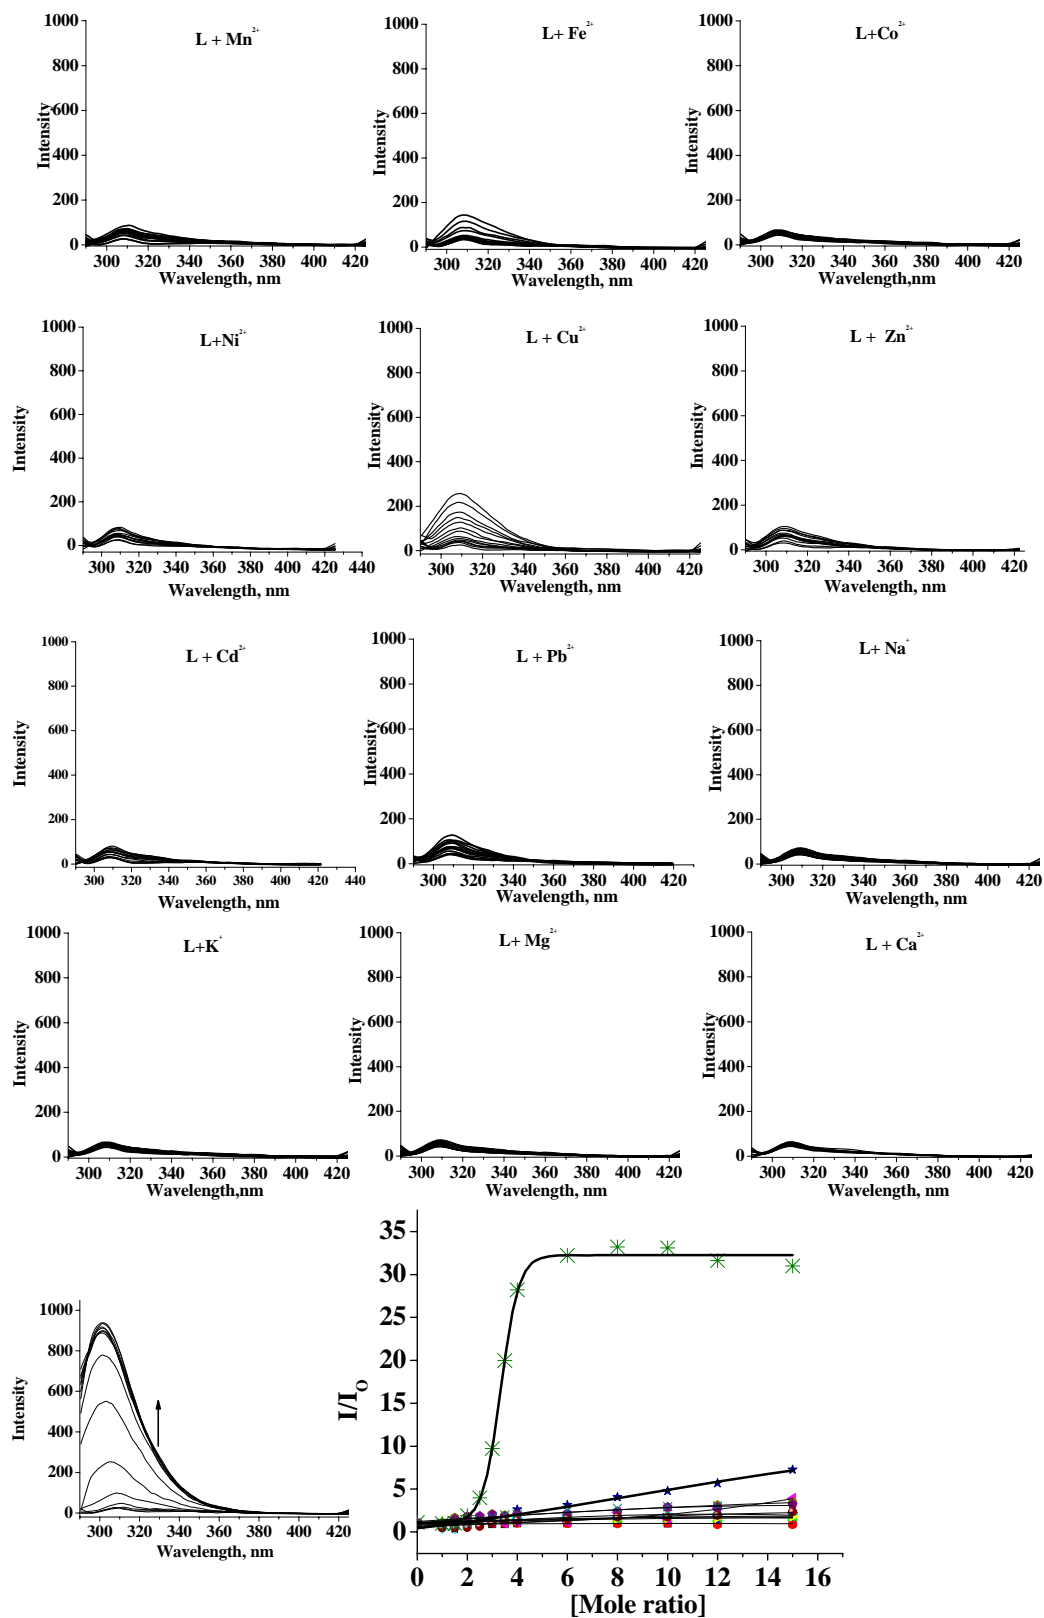



### S05. Fluorescence spectral data for minimum detection limit

Minimum detection limit experiment was carried out by recording fluorescence for various incremental concentrations of L as well as L : Hg<sup>2+</sup>(1:1) separately with initial concentration of 6×10<sup>-4</sup> and plotted the same as shown below. Point on x-axis at which the intensity difference between two lines is ~50 was considered as minimum detection limit.

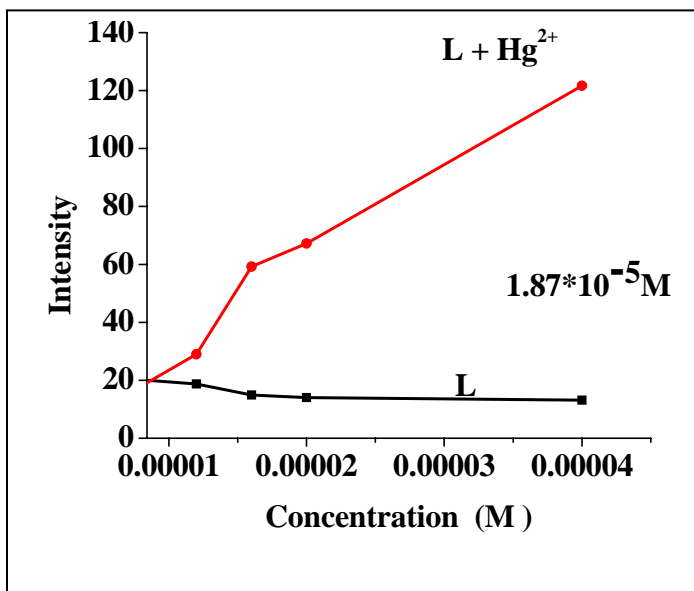

### S06. Absorption spectral traces for the titration of L with $M^{n+}$

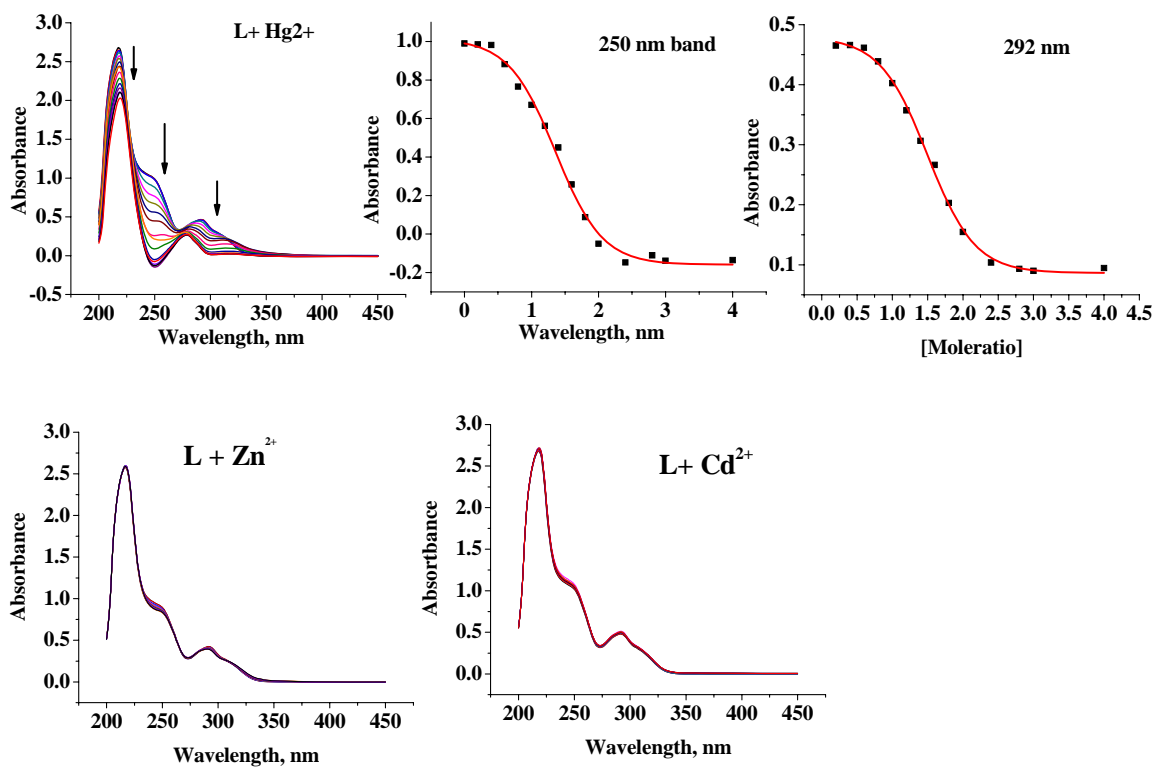

### Job's plot for the 1:1 complex formation between L and $Hg^{2+}$ plotted at 218 nm

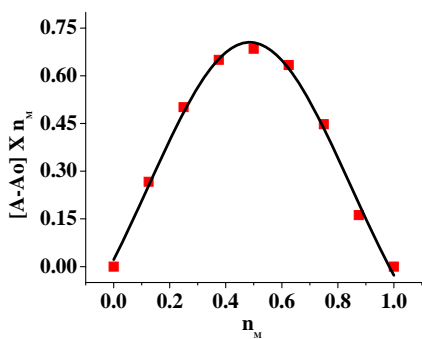

**S07.  $^1\text{H}$  NMR titration of L with mercuric perchlorate in DMSO**

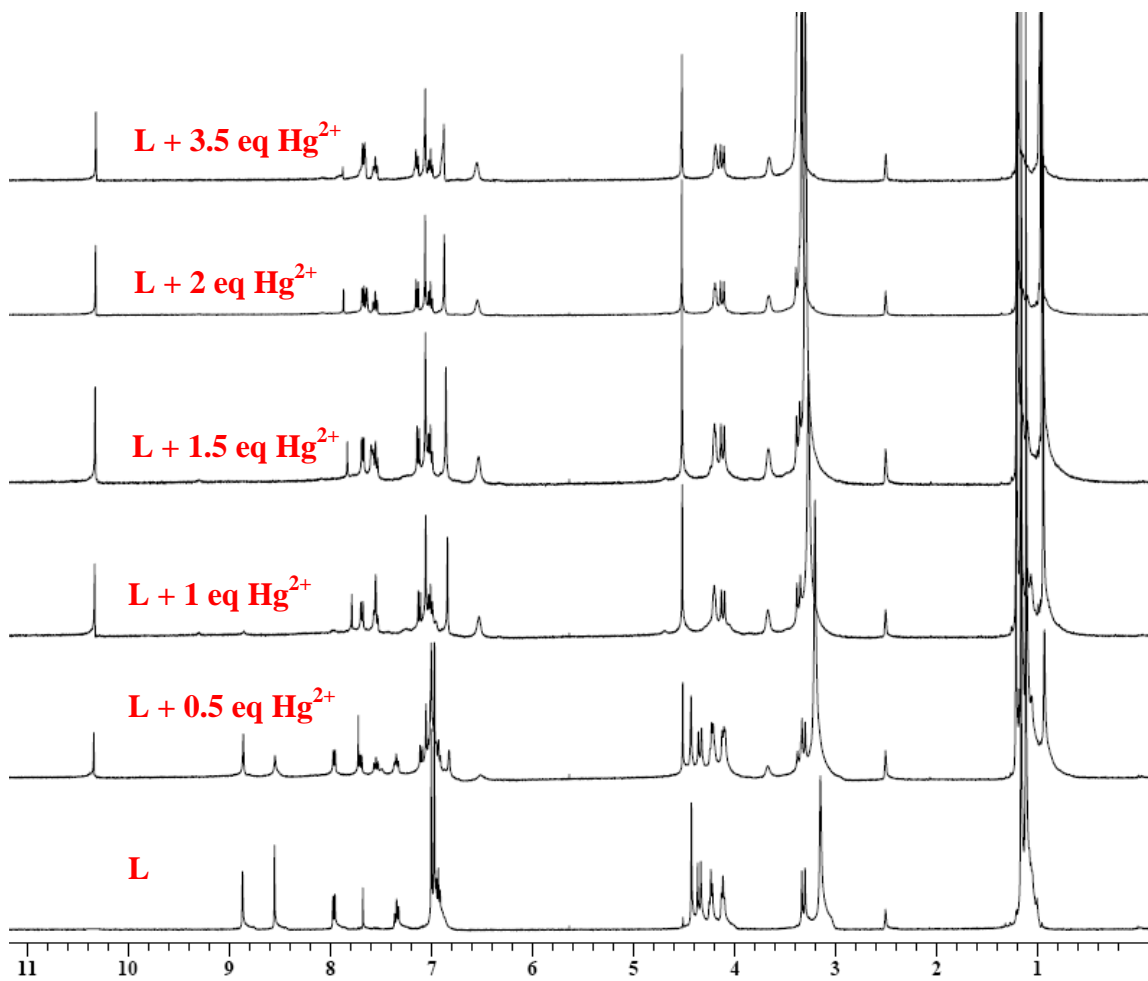

**S08. Synthesis and characterization of mercury complex of L (HgL):** To a solution of L (0.10 g, 0.103 mmol) in CHCl<sub>3</sub> (5mL), mercuric perchlorate (0.041 g, 0.103 mmol) in 25mL methanol was added drop-wise and stirred for 4 h. Then the reaction mixture was filtered and solvent was evaporated. The product was obtained by trituration with petroleum ether followed by recrystallization from CHCl<sub>3</sub> and MeOH. Yield (0.076 g, 63%). <sup>1</sup>H NMR (CDCl<sub>3</sub>, δ ppm): 0.85 (s, 18H, C(CH<sub>3</sub>)<sub>3</sub>), 1.25(s, 18H, C(CH<sub>3</sub>)<sub>3</sub>), 3.37 (d, 4H, Ar-CH<sub>2</sub>-Ar, *J* = 13.33 Hz), 3.74 (br, 4H, CH<sub>2</sub>-CH<sub>2</sub>), 4.07 (br, 8H, CH<sub>2</sub>-CH<sub>3</sub> & Ar-CH<sub>2</sub>-Ar), 4.53 (s, 4H, O-CH<sub>2</sub>-CH<sub>2</sub>-O), 7.07(m, 8H, Ar-H & 4H, Ar-H), 7.58 (t, 2H, Ar-H), 7.85 (d, 2H, Ar-H), 10.44 (s, 2H, Ar-CH-N). HRMS = 1169.5291(-3.4ppm)

**<sup>1</sup>H NMR Spectrum of (i) Isolated mercury complex, (ii) L with Hg<sup>2+</sup> in DMSO(titration), (iii) L**

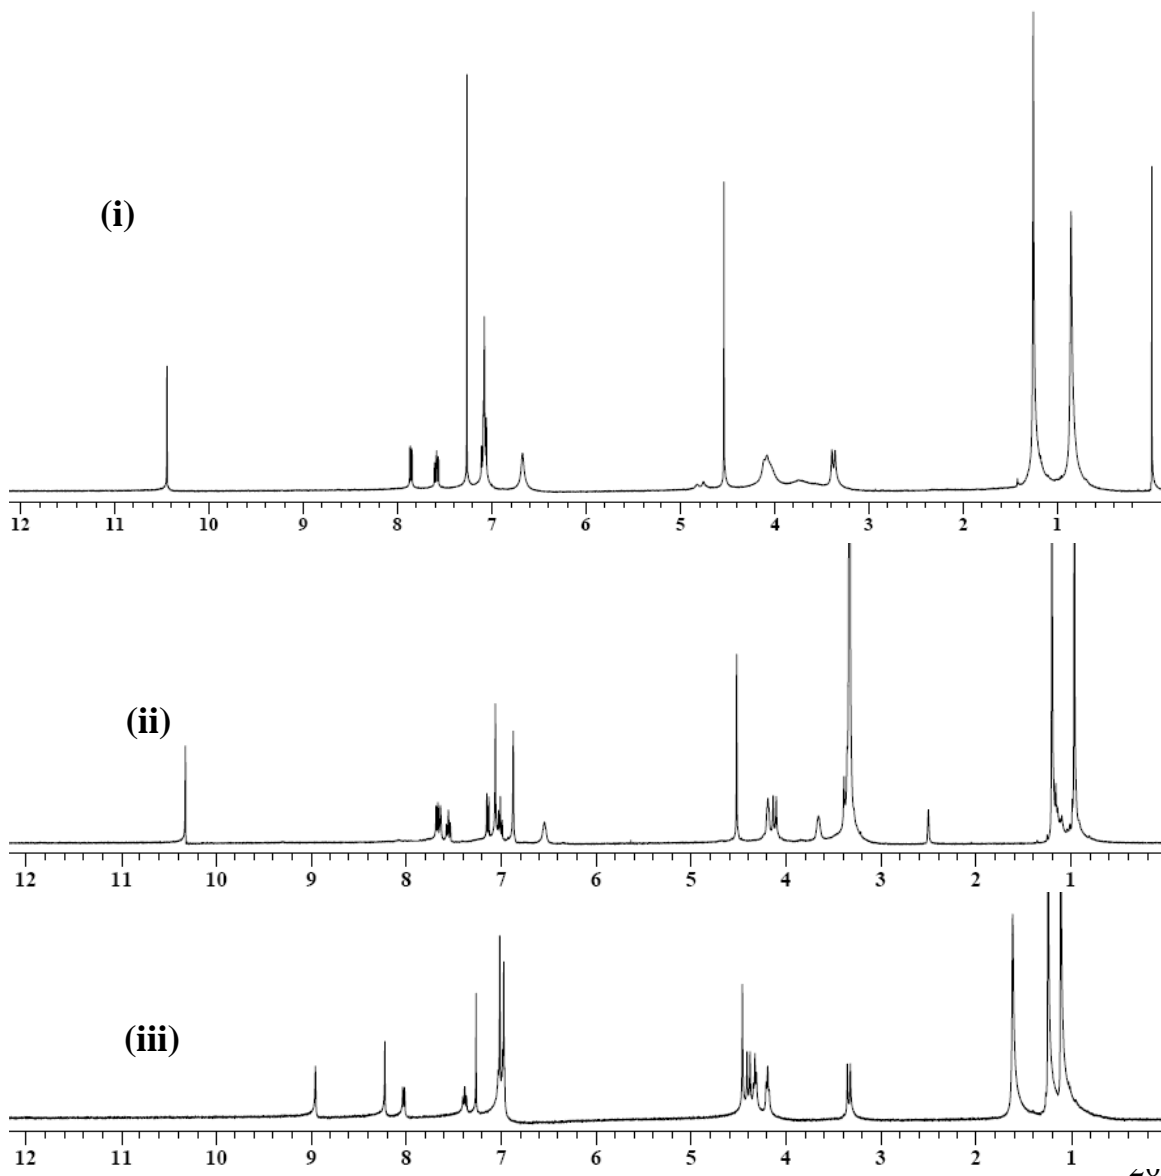

**S09. Mass spectral data for isolated and insitu prepared mercury complex:**

**(a). HRMS of isolated mercury complex:**

**Elemental Composition Report**

Page 1

**Single Mass Analysis (displaying only valid results)**

Tolerance = 20.0 PPM / DBE: min = -1.5, max = 50.0

Isotope matching not enabled

Monoisotopic Mass, Odd and Even Electron Ions

31 formula(e) evaluated with 1 results within limits (up to 50 closest results for each mass)

Micromass : Q-ToF micro (YA-105)

Dept. Of Chemistry I.I.T.(B)

10-Jun-2011 17:48:03

C<sub>64</sub>H<sub>74</sub>HgN<sub>2</sub>O<sub>6</sub>

CPR-AK-HG-ISOLATED 4 (0.041) Sb (5,40.00)

TOF MS ES+

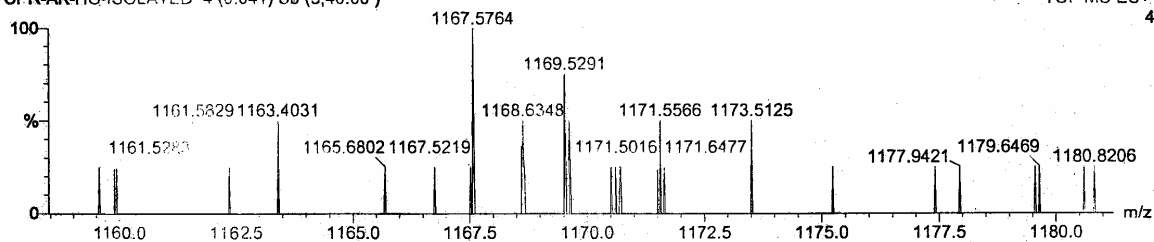

Minimum: -1.5  
 Maximum: 200.0 20.0 50.0

| Mass      | Calc. Mass | mDa  | PPM  | DBE  | Formula                                                          |
|-----------|------------|------|------|------|------------------------------------------------------------------|
| 1169.5291 | 1169.5331  | +4.1 | -3.5 | 28.5 | C <sub>64</sub> H <sub>75</sub> N <sub>2</sub> O <sub>6</sub> Hg |

**(b). Isotopic peak pattern of (M+1) ion peak for the isolated complex (a)  
 Experimental (b) Calculated.**

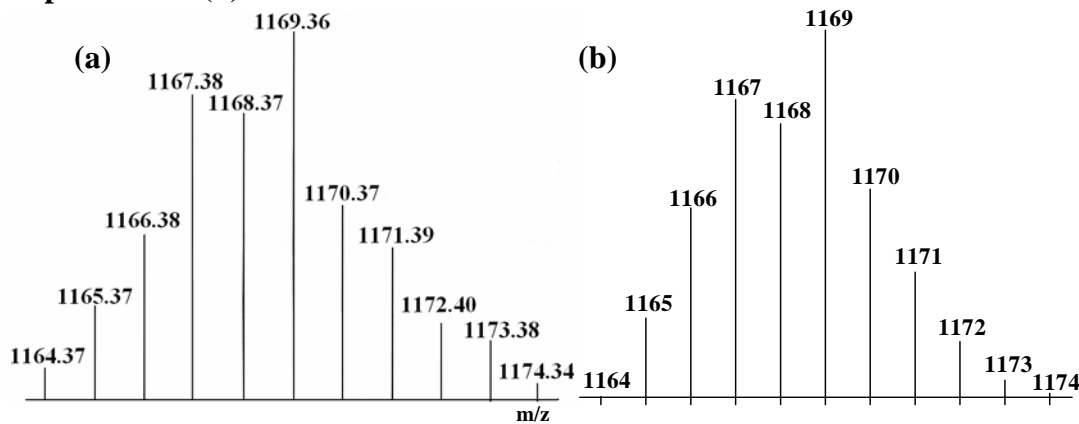

(c). FTIR spectrum of isolated mercury complex:

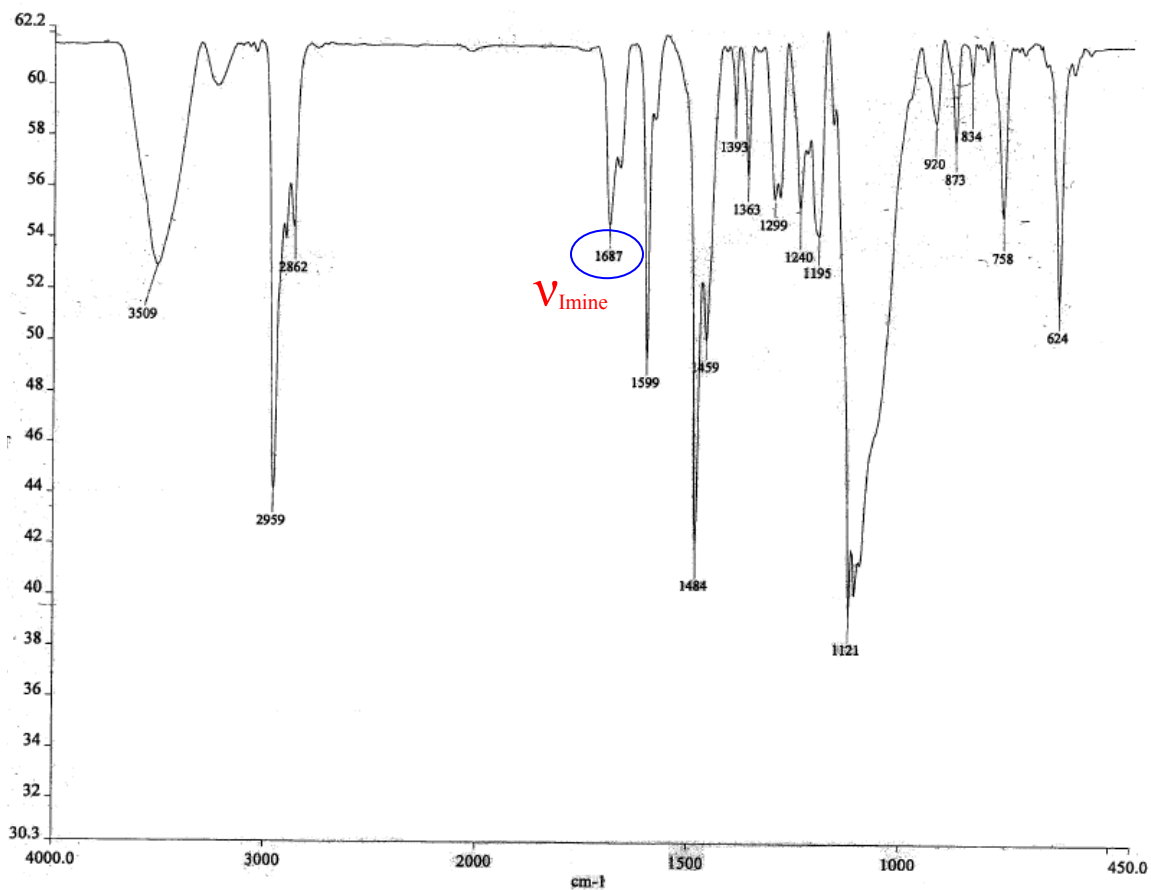

(d) Isotopic peak pattern of (M+1) ion peak for the insitu prepared complex (a) Experimental (b) Calculated.

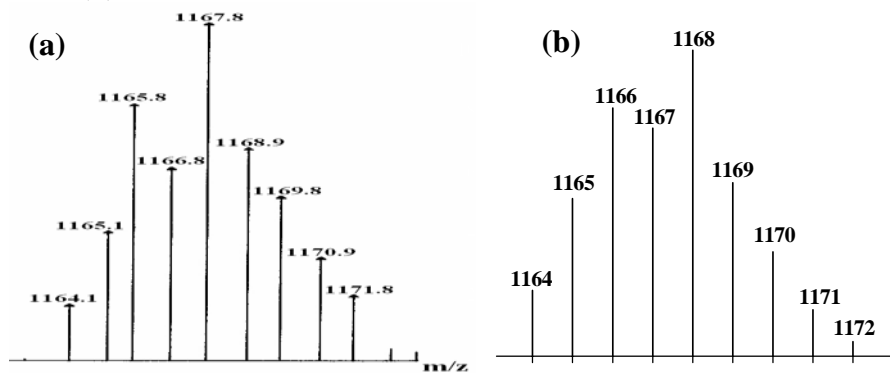

**S10: Computational data:**

**(a) Cartesian coordinates of B3LYP/6-31G optimized structure of L'**

| Z | Coordinates |           |           | Z | Coordinates |           |           |
|---|-------------|-----------|-----------|---|-------------|-----------|-----------|
|   | x           | y         | z         |   | x           | y         | z         |
| 8 | 0.817116    | 0.399740  | -0.044139 | 6 | -4.953974   | 3.067913  | -2.376254 |
| 6 | 0.454021    | 1.536867  | 0.650331  | 6 | 1.364588    | -3.036555 | 1.516055  |
| 6 | 0.135717    | 2.765701  | 0.029869  | 6 | -3.051033   | -2.105522 | 2.910909  |
| 6 | 0.444293    | 1.431019  | 2.054985  | 6 | -2.342131   | -3.681724 | 1.041388  |
| 6 | -0.143349   | 3.871927  | 0.842924  | 6 | -3.966357   | -0.579945 | 4.741830  |
| 6 | 0.052008    | 2.901391  | -1.488735 | 6 | 2.285624    | 0.024780  | -3.698171 |
| 6 | 0.174220    | 2.570151  | 2.825510  | 1 | 0.651654    | 1.212050  | -4.448013 |
| 6 | 0.690397    | 0.083083  | 2.722425  | 1 | 0.372056    | -0.554744 | -4.523543 |
| 1 | -0.377143   | 4.811859  | 0.349789  | 6 | -3.066304   | -2.074572 | -2.397156 |
| 6 | -0.118851   | 3.814320  | 2.247032  | 1 | -2.849389   | -1.289964 | -4.384557 |
| 6 | -1.198409   | 2.244185  | -2.067932 | 1 | -1.321082   | -1.567194 | -3.527327 |
| 1 | 0.032351    | 3.969316  | -1.733183 | 1 | -4.434696   | 0.454270  | -3.235952 |
| 1 | 0.946694    | 2.483434  | -1.961802 | 6 | -6.143085   | 2.251647  | -2.932883 |
| 1 | 0.199996    | 2.465930  | 3.904439  | 6 | -4.842920   | 4.380597  | -3.199515 |
| 1 | 1.084970    | 0.258420  | 3.731341  | 6 | -5.257909   | 3.417104  | -0.892991 |
| 1 | 1.449924    | -0.453171 | 2.154973  | 1 | 1.155512    | -4.097548 | 1.693458  |
| 6 | -0.580497   | -0.762427 | 2.833415  | 1 | 1.748763    | -2.589695 | 2.437648  |
| 6 | -0.410016   | 5.082826  | 3.077510  | 6 | 2.328440    | -2.844315 | 0.348393  |
| 6 | -1.159036   | 0.939313  | -2.594752 | 1 | -4.010303   | -2.614009 | 2.904111  |
| 6 | -2.432510   | 2.899151  | -2.011992 | 1 | -2.981273   | -4.425476 | 1.529671  |
| 6 | -0.817536   | -1.895056 | 2.042708  | 1 | -1.403623   | -4.187054 | 0.788610  |
| 6 | -1.603574   | -0.361997 | 3.711112  | 6 | -3.044310   | -3.225972 | -0.238571 |
| 6 | 0.623783    | 6.187163  | 2.723418  | 6 | -3.558005   | 0.631186  | 5.611714  |
| 6 | -0.326851   | 4.818115  | 4.598562  | 6 | -4.323247   | -1.757302 | 5.690407  |
| 6 | -1.839259   | 5.600731  | 2.756409  | 6 | -5.223991   | -0.182732 | 3.920298  |
| 8 | 0.112711    | 0.305784  | -2.629903 | 7 | 2.935346    | 1.237926  | -3.182830 |
| 6 | -2.323194   | 0.268056  | -2.993347 | 1 | 2.432802    | -0.850130 | -3.046100 |
| 6 | -3.621022   | 2.292487  | -2.456421 | 1 | 2.729963    | -0.215303 | -4.676030 |
| 1 | -2.458346   | 3.902255  | -1.597241 | 6 | -2.370443   | -2.506453 | -1.251191 |
| 8 | 0.135001    | -2.349869 | 1.105022  | 6 | -4.416946   | -2.411313 | -2.549025 |
| 6 | -2.059925   | -2.555507 | 2.033611  | 1 | -7.059961   | 2.848664  | -2.867053 |
| 1 | -1.420608   | 0.508684  | 4.328347  | 1 | -6.303838   | 1.329888  | -2.362306 |
| 6 | -2.840486   | -1.018742 | 3.779859  | 1 | -5.992544   | 1.985024  | -3.985490 |
| 1 | 1.642336    | 5.849711  | 2.947192  | 1 | -4.639964   | 4.161788  | -4.254322 |
| 1 | 0.425998    | 7.097031  | 3.304476  | 1 | -4.038688   | 5.024155  | -2.827641 |
| 1 | 0.582878    | 6.449750  | 1.660869  | 1 | -5.781588   | 4.945351  | -3.140034 |
| 1 | -1.061564   | 4.070078  | 4.918501  | 1 | -6.199539   | 3.975811  | -0.820101 |
| 1 | -0.534206   | 5.744903  | 5.146060  | 1 | -4.465086   | 4.030615  | -0.452272 |
| 1 | 0.670000    | 4.470816  | 4.893819  | 1 | -5.350193   | 2.505410  | -0.292037 |
| 1 | -1.950876   | 5.837991  | 1.692926  | 7 | 3.569556    | -3.590749 | 0.572627  |
| 1 | -2.055198   | 6.511082  | 3.330245  | 1 | 1.845387    | -3.244903 | -0.552925 |

|   |           |           |           |   |           |           |           |
|---|-----------|-----------|-----------|---|-----------|-----------|-----------|
| 1 | -2.591093 | 4.845498  | 3.013135  | 1 | 2.487210  | -1.766836 | 0.188810  |
| 6 | 0.802443  | 0.259077  | -3.930088 | 6 | -4.401609 | -3.522259 | -0.426506 |
| 6 | -2.342467 | -1.202573 | -3.415047 | 1 | -4.385212 | 0.897939  | 6.279487  |
| 6 | -3.536734 | 0.976145  | -2.929385 | 1 | -3.327197 | 1.510176  | 4.998975  |
| 1 | -2.685435 | 0.405227  | 6.235628  | 6 | 5.932517  | 4.617106  | -0.870199 |
| 1 | -4.658350 | -2.637674 | 5.131820  | 1 | 4.297167  | 5.726607  | -1.742594 |
| 1 | -5.130044 | -1.463414 | 6.373380  | 1 | 7.386894  | -6.728865 | 0.885968  |
| 1 | -3.454142 | -2.049308 | 6.291276  | 6 | 8.493127  | -4.903475 | 0.553204  |
| 1 | -5.591130 | -1.016982 | 3.313350  | 6 | 8.045804  | -0.697178 | -0.367215 |
| 1 | -4.997680 | 0.650019  | 3.244931  | 1 | 9.335567  | -2.950240 | 0.231384  |
| 1 | -6.033298 | 0.127959  | 4.592770  | 1 | 7.385072  | 1.014149  | 0.757703  |
| 6 | 3.992983  | 1.138740  | -2.453131 | 1 | 8.438047  | 1.383689  | -0.638959 |
| 8 | -1.026914 | -2.208672 | -1.228831 | 1 | 6.415758  | 5.492059  | -0.447119 |
| 6 | -5.116917 | -3.142765 | -1.575410 | 1 | 9.462725  | -5.391373 | 0.552769  |
| 1 | -4.921197 | -2.088425 | -3.453103 | 1 | 8.182212  | -1.006506 | -1.410132 |
| 6 | 4.683801  | -2.959943 | 0.427075  | 1 | 8.999239  | -0.804328 | 0.166364  |
| 1 | -4.906235 | -4.084355 | 0.354842  | 1 | 0.637587  | 0.390577  | -1.021566 |
| 6 | 4.679897  | 2.331016  | -1.935191 | 6 | 7.616258  | 0.749328  | -0.280663 |
| 1 | 4.425579  | 0.172430  | -2.174818 | 1 | 7.434020  | 3.278303  | -0.121352 |
| 1 | -0.559672 | -2.283280 | -0.352460 | 8 | 7.012690  | -1.502351 | 0.257669  |
| 6 | -6.605210 | -3.528556 | -1.719654 | 6 | 8.423197  | -3.518280 | 0.366993  |
| 1 | 4.716448  | -1.893120 | 0.183564  |   |           |           |           |
| 6 | 5.985463  | -3.630573 | 0.529657  |   |           |           |           |
| 6 | 5.897234  | 2.220383  | -1.222957 |   |           |           |           |
| 6 | 4.129432  | 3.611652  | -2.118917 |   |           |           |           |
| 6 | -7.421387 | -2.903554 | -0.554666 |   |           |           |           |
| 6 | -6.751935 | -5.074536 | -1.674460 |   |           |           |           |
| 6 | -7.212393 | -3.029618 | -3.051147 |   |           |           |           |
| 6 | 6.085036  | -5.019062 | 0.721659  |   |           |           |           |
| 6 | 7.175374  | -2.884343 | 0.373027  |   |           |           |           |
| 8 | 6.439983  | 0.938383  | -1.113268 |   |           |           |           |
| 6 | 6.512168  | 3.357909  | -0.682946 |   |           |           |           |
| 6 | 4.743372  | 4.749127  | -1.595593 |   |           |           |           |
| 1 | 3.202351  | 3.680465  | -2.675512 |   |           |           |           |
| 1 | -7.062144 | -3.251173 | 0.419925  |   |           |           |           |
| 1 | -8.481300 | -3.175071 | -0.640491 |   |           |           |           |
| 1 | -7.343145 | -1.810287 | -0.571229 |   |           |           |           |
| 1 | -6.195783 | -5.539859 | -2.496404 |   |           |           |           |
| 1 | -7.807226 | -5.361829 | -1.766180 |   |           |           |           |
| 1 | -6.370854 | -5.488104 | -0.734578 |   |           |           |           |
| 1 | -7.171521 | -1.936941 | -3.129778 |   |           |           |           |
| 1 | -8.265296 | -3.328799 | -3.111155 |   |           |           |           |
| 1 | -6.693366 | -3.457662 | -3.916536 |   |           |           |           |
| 1 | 5.161924  | -5.575673 | 0.837259  |   |           |           |           |
| 6 | 7.326446  | -5.655755 | 0.740008  |   |           |           |           |



**(b) Cartesian coordinates of B3LYP/CEP-121G optimized structure of [HgL']**

|   |           |           |           |   |           |           |           |
|---|-----------|-----------|-----------|---|-----------|-----------|-----------|
| 8 | 1.065374  | -2.024810 | -0.869578 | 1 | -1.570109 | -2.331013 | 1.825906  |
| 6 | 2.376990  | -2.463673 | -0.788249 | 6 | -2.133856 | -0.760938 | 3.238550  |
| 6 | 3.279600  | -2.249086 | -1.885686 | 1 | 3.218196  | 1.045331  | 4.631377  |
| 6 | 2.803424  | -3.216276 | 0.358860  | 1 | 0.706753  | 1.899939  | 4.251386  |
| 6 | 4.546197  | -2.882125 | -1.857771 | 1 | -0.104589 | 1.272294  | 2.800124  |
| 6 | 2.893804  | -1.330448 | -3.064420 | 6 | 1.612317  | 2.522446  | 2.389396  |
| 6 | 4.078603  | -3.829410 | 0.339993  | 7 | -1.499128 | 0.006680  | -2.014743 |
| 6 | 1.905484  | -3.313539 | 1.608415  | 1 | -1.229272 | 2.086712  | -2.102695 |
| 1 | 5.221266  | -2.755615 | -2.704055 | 1 | -1.999199 | 1.416344  | -3.572009 |
| 6 | 4.946436  | -3.682646 | -0.765165 | 6 | 1.365211  | 2.615394  | 0.977326  |
| 6 | 3.387398  | 0.123237  | -2.878802 | 6 | 3.138487  | 4.303025  | 0.780852  |
| 1 | 3.338400  | -1.735909 | -3.984897 | 7 | -2.438633 | 0.313290  | 2.275554  |
| 1 | 1.807348  | -1.342616 | -3.177610 | 1 | -3.030338 | -1.334389 | 3.551864  |
| 1 | 4.392152  | -4.431681 | 1.192827  | 1 | -1.697516 | -0.292599 | 4.132026  |
| 1 | 2.104884  | -4.268955 | 2.114932  | 6 | 2.580654  | 3.378466  | 2.966884  |
| 1 | 0.859333  | -3.303041 | 1.294521  | 6 | -2.671875 | -0.556035 | -2.064077 |
| 6 | 2.176218  | -2.157125 | 2.597879  | 8 | 0.285474  | 1.949641  | 0.413932  |
| 6 | 2.512771  | 1.180063  | -2.503133 | 6 | 3.333050  | 4.278440  | 2.179353  |
| 6 | 4.766324  | 0.438578  | -2.978653 | 1 | 3.732721  | 4.980183  | 0.167100  |
| 6 | 1.304978  | -1.037788 | 2.723896  | 6 | -3.655113 | 0.520210  | 1.870175  |
| 6 | 3.387916  | -2.119137 | 3.331359  | 1 | 2.741187  | 3.348254  | 4.044484  |
| 8 | 1.119702  | 0.897291  | -2.387898 | 6 | -2.971334 | -1.853369 | -1.404361 |
| 6 | 2.968121  | 2.455148  | -2.065741 | 6 | -3.967390 | 1.632492  | 0.931092  |
| 6 | 5.242962  | 1.729485  | -2.663402 | 6 | -4.308317 | -2.167131 | -1.010903 |
| 1 | 5.468113  | -0.336050 | -3.279574 | 6 | -1.956485 | -2.826484 | -1.203915 |
| 8 | 0.047019  | -1.075629 | 2.040470  | 6 | -2.960286 | 2.570324  | 0.566312  |
| 6 | 1.678939  | 0.166636  | 3.384469  | 6 | -5.272137 | 1.795770  | 0.387144  |
| 1 | 4.072235  | -2.962666 | 3.270710  | 8 | -5.257585 | -1.140112 | -1.181012 |
| 6 | 3.733504  | -0.990423 | 4.104623  | 6 | -4.625768 | -3.433828 | -0.468266 |
| 6 | 0.162848  | 1.158049  | -3.471754 | 6 | -2.265981 | -4.085981 | -0.645313 |
| 6 | 2.029662  | 3.472245  | -1.378252 | 1 | -0.928991 | -2.598089 | -1.477377 |
| 6 | 4.355820  | 2.717308  | -2.182687 | 1 | -1.950285 | 2.421834  | 0.939938  |
| 6 | -1.112688 | -1.763813 | 2.643638  | 6 | -3.256194 | 3.648610  | -0.290760 |
| 6 | 2.904331  | 0.150947  | 4.098780  | 8 | -6.280361 | 0.865357  | 0.761997  |
| 6 | 0.869311  | 1.478630  | 3.248147  | 6 | -5.579134 | 2.886256  | -0.459506 |
| 6 | -1.229525 | 1.240693  | -2.801334 | 6 | -6.556825 | -1.228351 | -0.499074 |
| 1 | 0.212326  | 0.340393  | -4.204908 | 1 | -5.645652 | -3.683240 | -0.192877 |
| 1 | 0.404640  | 2.109558  | -3.966668 | 6 | -3.598707 | -4.390824 | -0.290333 |
| 6 | 2.176396  | 3.472105  | 0.157609  | 1 | -1.476002 | -4.819027 | -0.506389 |
| 1 | 2.267772  | 4.477488  | -1.754528 | 1 | -2.474113 | 4.358036  | -0.549893 |

|    |           |           |           |   |           |          |           |
|----|-----------|-----------|-----------|---|-----------|----------|-----------|
| 1  | 0.990347  | 3.249524  | -1.629526 | 6 | -4.569166 | 3.813674 | -0.796795 |
| 1  | 4.742405  | 3.685786  | -1.871946 | 6 | -7.061232 | 0.204120 | -0.299950 |
| 1  | -0.762089 | -2.456257 | 3.421223  | 1 | -6.593476 | 3.018037 | -0.828175 |
| 1  | -6.440705 | -1.710493 | 0.479810  |   |           |          |           |
| 1  | -7.260891 | -1.807849 | -1.116504 |   |           |          |           |
| 1  | -3.847917 | -5.366644 | 0.121813  |   |           |          |           |
| 1  | -4.809103 | 4.658363  | -1.439866 |   |           |          |           |
| 1  | -6.996672 | 0.765243  | -1.239581 |   |           |          |           |
| 1  | -8.101502 | 0.182626  | 0.046058  |   |           |          |           |
| 1  | 4.060478  | 4.940372  | 2.644874  |   |           |          |           |
| 1  | 4.662784  | -0.983370 | 4.670794  |   |           |          |           |
| 1  | 5.916044  | -4.176362 | -0.771979 |   |           |          |           |
| 1  | 6.304185  | 1.952173  | -2.754562 |   |           |          |           |
| 80 | 0.385320  | -0.087738 | -0.238791 |   |           |          |           |
| 1  | -4.503519 | -0.092191 | 2.209874  |   |           |          |           |
| 1  | -3.494362 | -0.098623 | -2.630392 |   |           |          |           |

**(c). Dihedral angles(°) of the arms obtained upon optimization for L' and its Hg<sup>2+</sup> complex.**

|                | <b>L</b><br>(Crystal structure) | <b>L'</b> | <b>[HgL']</b> |
|----------------|---------------------------------|-----------|---------------|
| O2-C29-C31-N1  | 168.3                           | 174.8     | 55.1          |
| C29-C31-N1-C30 | 130.9                           | 129.8     | 137.4         |
| C31-N1-C30-C32 | 173.2                           | 175.4     | -174.3        |
| N1-C30-C32-C37 | 169.0                           | 179.4     | -154.4        |
| C30-C32-C37-O5 | -6.4                            | -6.1      | 5.4           |
| C32-C37-O5-C38 | 150.8                           | 157.9     | 164.2         |
| C37-O5-C38-C39 | -164.8                          | 177.2     | -153.4        |
| O5-C38-C39-O6  | 62.5                            | 66.8      | 73.1          |
| C38-C39-O6-C40 | 169.2                           | 177.7     | -102.7        |
| C39-O6-C40-C45 | 179.1                           | 173.9     | 128.6         |
| O6-C40-C45-C46 | -5.9                            | -3.7      | 0.04          |
| C40-C45-C46-N2 | 160.9                           | 175.0     | -174.3        |
| C45-C46-N2-C47 | 179.1                           | -179.1    | -178.1        |
| C46-N2-C47-C48 | -141.4                          | -152.9    | -121.4        |
| N2-C47-C48-O4  | 78.2                            | 73.8      | -48.3         |

### S11: TDDFT data

Normalized reflectance spectrum and TDDFT singlet mono electronic transitions calculated for isolated mercury complex [HgL'].

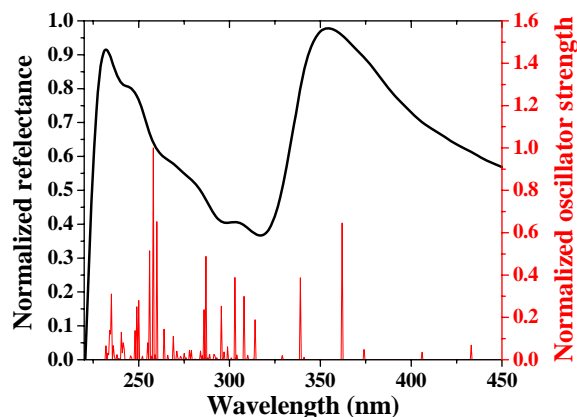

#### (b). Calculated energy levels of the main singlet transitions of L

| State | Assignment                                                                                        | coefficient                  | Energy (eV) | Wavelength | Oscillator strength |
|-------|---------------------------------------------------------------------------------------------------|------------------------------|-------------|------------|---------------------|
| S9    | HOMO-13 -> LUMO<br>HOMO-12 -> LUMO                                                                | 31%<br>10%                   | 4.259       | 291.5      | 0.0148              |
| S10   | HOMO-6 -> LUMO<br>HOMO-13 -> LUMO<br>HOMO-11 -> LUMO<br>HOMO-11 -> LUMO+5                         | 46%<br>3%<br>9%<br>3%        | 4.279       | 290.0      | 0.0634              |
| S12   | HOMO-3 -> LUMO<br>HOMO-3 -> LUMO+1<br>HOMO-13 -> LUMO+1                                           | 16%<br>47%<br>3%             | 4.304       | 288.4      | 0.0111              |
| S13   | HOMO-7 -> LUMO+1<br>HOMO-6 -> LUMO+1<br>HOMO-12 -> LUMO+1<br>HOMO-4 -> LUMO+1<br>HOMO-3 -> LUMO+1 | 15%<br>37%<br>4%<br>8%<br>2% | 4.362       | 284.5      | 0.1511              |
| S14   | HOMO-13 -> LUMO<br>HOMO-5 -> LUMO                                                                 | 14%<br>49%                   | 4.368       | 284.2      | 0.0237              |
| S15   | HOMO -> LUMO+2                                                                                    | 83%                          | 4.381       | 283.2      | 0.0603              |
| S16   | HOMO-4 -> LUMO+1<br>HOMO-3 -> LUMO+1                                                              | 70%<br>9%                    | 4.388       | 282.8      | 0.0286              |
| S19   | HOMO-6 -> LUMO+1<br>HOMO-7 -> LUMO<br>HOMO-5 -> LUMO+1                                            | 44%<br>3%<br>9%              | 4.470       | 277.7      | 0.0217              |
| S26   | HOMO-1 -> LUMO+4                                                                                  | 84%                          | 4.664       | 266.1      | 0.016               |

|     |                                                        |                  |       |       |        |
|-----|--------------------------------------------------------|------------------|-------|-------|--------|
| S28 | HOMO -> LUMO+7                                         | 64%              | 4.737 | 262.1 | 0.0122 |
| S30 | HOMO-1 -> LUMO+6<br>HOMO -> LUMO+7<br>HOMO-1 -> LUMO+4 | 52%<br>25%<br>2% | 4.764 | 260.5 | 0.0175 |
| S34 | HOMO-11 -> LUMO<br>HOMO-1 -> LUMO+5                    | 21%<br>36%       | 4.939 | 251.3 | 0.0675 |
| S35 | HOMO-11 -> LUMO<br>HOMO -> LUMO+5                      | 39%<br>12%       | 4.945 | 251.0 | 0.112  |
| S36 | HOMO-10 -> LUMO                                        | 89%              | 4.959 | 250.3 | 0.0147 |
|     |                                                        |                  |       |       |        |

(c) Calculated energy levels of the main singlet transitions of [HgL']

| State | Assignment                                                             | coefficient           | Energy (eV) | Wavelength | Oscillator strength |
|-------|------------------------------------------------------------------------|-----------------------|-------------|------------|---------------------|
| S5    | HOMO -> LUMO+2                                                         | 89%                   | 3.429       | 362.0      | 0.0892              |
| S7    | HOMO-1 -> LUMO+2                                                       | 90%                   | 3.666       | 338.6      | 0.0534              |
| S10   | HOMO-5 -> LUMO                                                         | 69%                   | 3.951       | 314.1      | 0.0262              |
| S14   | HOMO -> LUMO+4<br>HOMO-6 -> LUMO                                       | 88%<br>3%             | 4.035       | 307.6      | 0.0411              |
| S16   | HOMO-10 -> LUMO<br>HOMO -9 -> LUMO<br>HOMO-4 -> LUMO+1                 | 56%<br>5%<br>3%       | 4.102       | 302.6      | 0.0535              |
| S21   | HOMO-11 -> LUMO<br>HOMO-14 -> LUMO<br>HOMO-9 -> LUMO<br>HOMO-8 -> LUMO | 70%<br>2%<br>2%<br>8% | 4.199       | 295.6      | 0.0347              |
| S30   | HOMO-13 -> LUMO<br>HOMO-5 -> LUMO+1<br>HOMO-12 -> LUMO+1               | 45%<br>29%<br>3%      | 4.347       | 285.5      | 0.0326              |

S12: Gaussian 03 reference

M. J. Frisch, G. W. Trucks, H. B. Schlegel, G. E. Scuseria, M. A. Robb, J. R. Cheeseman, Jr. J. A. Montgomery, T. Vreven, K. N. Kudin, J. C. Burant, J. M. Millam, S. S. Iyengar, J. Tomasi, V. Barone, B. Mennucci, M. Cossi, G. Scalmani, N. Rega, G. A. Petersson, H. Nakatsuji, M. Hada, M. Ehara, K. Toyota, R. Fukuda, J. Hasegawa, M. Ishida, T. Nakajima, Y. Honda, O. Kitao, H. Nakai, M. Klene, X. Li, J. E. Knox, H. P. Hratchian, J. B. Cross, C. Adamo, J. Jaramillo, R. Gomperts, R. E. Stratmann, O. Yazyev, A. J. Austin, R. Cammi, C. Pomelli, J. W. Ochterski, P. Y. Ayala, K. Morokuma, G. A. Voth, P. Salvador, J. J. Dannenberg, V. G. Zakrzewski, S. Dapprich, A. D. Daniels, M. C. Strain, O. Farkas, D. K. Malick, A. D. Rabuck, K. Raghavachari, J. B. Foresman, J. V. Ortiz, Q. Cui, A. G. Baboul, S. Clifford, J. Cioslowski, B. B. Stefanov, G. Liu, A. Liashenko, P. Piskorz, I. Komaromi, R. L. Martin, D. J. Fox, T. Keith, M. A. Al-Laham, C. Y. Peng, A. Nanayakkara, M. Challacombe, P. M. W. Gill, B. Johnson, W. Chen, M. W. Wong, C. Gonzalez, J. A. Pople, *Gaussian 03*, revision C.02; Gaussian, Inc.: Wallingford, CT, 2004.

S13: Absorption spectral traces and powder X-ray diffractograms of **L** and [**HgL**]

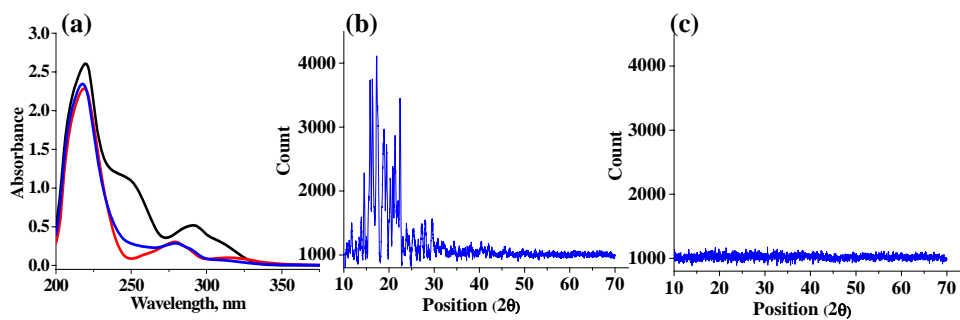

(a) Absorption spectral trace for **L** (—), the *in situ* prepared mercury complex (—) and Isolated mercury complex (—). Powder X-ray diffractograms for: (b) **L** and (c) Isolated mercury complex.
